# Supplementary material
Source: PubMed Central journal article supplement (PMC3026088)
Supplement: NIHMS240916-supplement-01.pdf [file NIHMS240916-supplement-01.pdf]

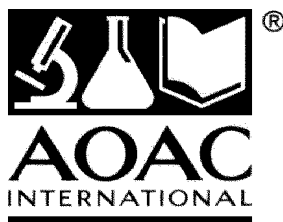

July 6, 2010

Dear Dr. Betz,

Thank you for your request asking permission to copy from the *Journal of AOAC INTERNATIONAL*. Permission is granted provided credit is given according to the following example:

Reprinted from *The Journal of AOAC INTERNATIONAL*, J.M. Betz, M.L. Gay, B.S. Portz, M.M. Mossoba, S. Adams, (1997) *J. AOAC Int.* **80** 303-315. Copyright 1997 by AOAC INTERNATIONAL. Permission is granted for a reprint of Figure 4.

Reprinted from *The Journal of AOAC INTERNATIONAL*, M.L. Gay, K.D. White, W.R. Obermeyer, J.M. Betz, S.M. Musser, (2001) *J. AOAC Int.* **84** 761-769. Copyright 2001 by AOAC INTERNATIONAL. Permission is granted for a reprint of Figures 2 and 3.

Sincerely,

A handwritten signature in black ink, appearing to read "Robert Rathbone", is placed below the word "Sincerely,".

Robert Rathbone  
Sr. Director of Publications  
*J. AOAC Int.*  
AOAC INTERNATIONAL  
481 N. Frederick Ave., Suite 500  
Gaithersburg, MD 20877  
301/924-7077
